# Supplementary material for: Biological sex, sex steroids and sex chromosomes contribute to mouse cardiac aging
Source: publisher site journal article supplement (doi:10.18632/aging.205822), 2024-05-13
Supplement: Supplementary file [file aging-v16i9-205822-supplementary-material-SD1.pdf]

SUPPLEMENTARY FIGURE

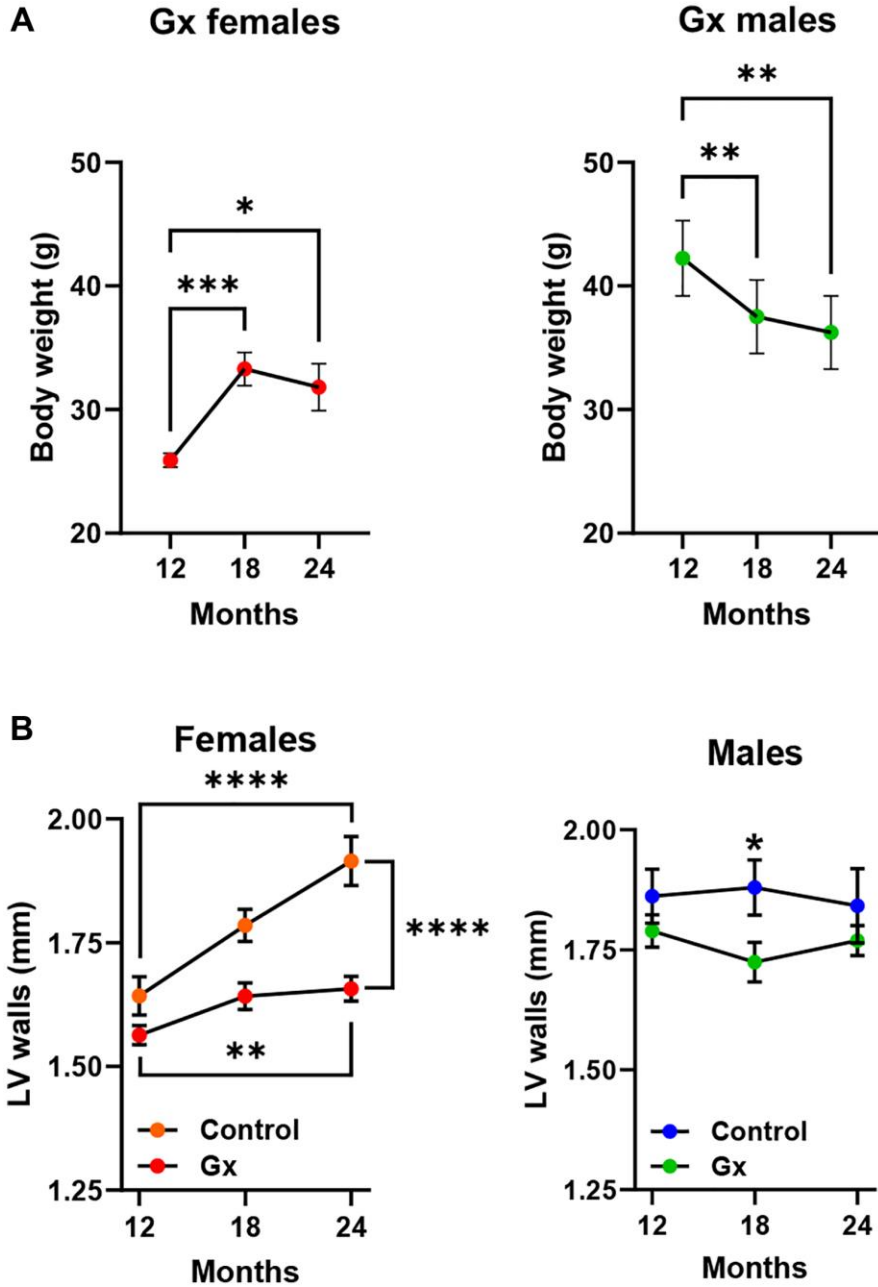

**Supplementary Figure 1.** Progression of body weight (A) and LV walls thickness (B) in older mice after gonadectomy compared to age-matched controls. Results are expressed as the mean ± SEM. (A, B) Statistical analysis by one-way ANOVA followed by Holm-Sidak post-test. \* $p < 0.05$ , \*\* $p < 0.01$  and \*\*\*\* $p < 0.0001$  between indicated groups.
