# Supplementary material for: Biological sex, sex steroids and sex chromosomes contribute to mouse cardiac aging
Source: publisher site journal article supplement (doi:10.18632/aging.205822), 2024-05-13
Supplement: Supplementary file [file aging-v16i9-205822-supplementary-material-SD2.pdf]

## SUPPLEMENTARY TABLES

**Supplementary Table 1. Means  $\pm$  SEM of several morphological parameters for male and female mice at 3, 12 and 24 months, Gx or not.**

| <b>Males</b>             | <b>3 m</b>      | <b>12 m</b>     | <b>24 m</b>     |
|--------------------------|-----------------|-----------------|-----------------|
| <b>Controls</b>          |                 |                 |                 |
| <i>Heart, mg</i>         | 130 $\pm$ 4.0   | 167 $\pm$ 9.0   | 180 $\pm$ 6.5   |
| <i>Lungs, mg</i>         | 128 $\pm$ 1.5   | 182 $\pm$ 8.2   | 189 $\pm$ 7.9   |
| <i>Left atrium, mg</i>   | 3.6 $\pm$ 0.34  | ---             | 6.6 $\pm$ 0.41  |
| <i>Body weight, g</i>    | 25.9 $\pm$ 0.62 | 36.7 $\pm$ 1.58 | 35 $\pm$ 1.6    |
| <i>Tibial length, mm</i> | 22.6 $\pm$ 0.06 | 22.6 $\pm$ 0.06 | 23.2 $\pm$ 0.15 |
| <b>Gx</b>                |                 |                 |                 |
| <i>Heart, mg</i>         | ---             | 139.3 $\pm$ 5.2 | 157 $\pm$ 4.4   |
| <i>Lungs, mg</i>         | ---             | 158 $\pm$ 8.1   | 185 $\pm$ 5.9   |
| <i>Left atrium, mg</i>   | ---             | ---             | 4.6 $\pm$ 0.26  |
| <i>Body weight, g</i>    | ---             | 31.4 $\pm$ 1.95 | 37.6 $\pm$ 2.17 |
| <i>Tibial length, mm</i> | ---             | 23.4 $\pm$ 0.17 | 23.6 $\pm$ 0.14 |
| <b>Females</b>           | <b>3 m</b>      | <b>12 m</b>     | <b>24 m</b>     |
| <b>Controls</b>          |                 |                 |                 |
| <i>Heart, mg</i>         | 101 $\pm$ 2.0   | 122 $\pm$ 4.7   | 150 $\pm$ 4.6   |
| <i>Lungs, mg</i>         | 118 $\pm$ 2.3   | 168 $\pm$ 5.9   | 174 $\pm$ 5.8   |
| <i>Left atrium, mg</i>   | 2.8 $\pm$ 0.11  | ---             | 4.8 $\pm$ 0.43  |
| <i>Body weight, g</i>    | 19.4 $\pm$ 0.29 | 28.5 $\pm$ 0.58 | 30.3 $\pm$ 1.76 |
| <i>Tibial length, mm</i> | 21.7 $\pm$ 0.10 | 22.1 $\pm$ 0.09 | 22.9 $\pm$ 0.15 |
| <b>Gx</b>                |                 |                 |                 |
| <i>Heart, mg</i>         | ---             | 139.3 $\pm$ 5.2 | 129 $\pm$ 3.4   |
| <i>Lungs, mg</i>         | ---             | 158 $\pm$ 8.1   | 178 $\pm$ 5.9   |
| <i>Left atrium, mg</i>   | ---             | ---             | 3.3 $\pm$ 0.21  |
| <i>Body weight, g</i>    | ---             | 31.4 $\pm$ 1.95 | 31.8 $\pm$ 1.90 |
| <i>Tibial length, mm</i> | ---             | 23.4 $\pm$ 0.17 | 23.6 $\pm$ 0.14 |

**Supplementary Table 2. Echocardiography (Echo) data from young FCG mice at 3 months.**

| <b>Parameter</b> | <b>MXV<br/>N = 13</b> | <b>FXX<br/>N = 14</b> | <b>MXX<br/>N = 15</b> | <b>FXV<br/>N = 20</b> |
|------------------|-----------------------|-----------------------|-----------------------|-----------------------|
| <b>M-Mode</b>    |                       |                       |                       |                       |
| EDD, mm          | 3,8 $\pm$ 0,05        | 3.7 $\pm$ 0,04        | 3,9 $\pm$ 0,04        | 3.7 $\pm$ 0,02        |
| ESD, mm          | 2,7 $\pm$ 0,06        | 2.6 $\pm$ 0,06        | 2,7 $\pm$ 0,06        | 2.7 $\pm$ 0,05        |
| PW, mm           | 0,70 $\pm$ 0,01       | 0.70 $\pm$ 0,01       | 0,75 $\pm$ 0,01*      | 0,69 $\pm$ 0,01       |
| IVS, mm          | 0,70 $\pm$ 0,01       | 0,67 $\pm$ 0,01       | 0,72 $\pm$ 0,01       | 0,67 $\pm$ 0,01       |
| RWT              | 0,34 $\pm$ 0,01       | 0,37 $\pm$ 0,01       | 0,38 $\pm$ 0,01*      | 0,37 $\pm$ 0,01       |
| <b>Simpson's</b> |                       |                       |                       |                       |
| SV, mm           | 31,3 $\pm$ 0,83       | 26.6 $\pm$ 0.66       | 34.2 $\pm$ 1,13       | 26.8 $\pm$ 0.72       |
| EF, %            | 56,9 $\pm$ 1.7        | 57.5 $\pm$ 1.3        | 58.4 $\pm$ 1.4        | 55.8 $\pm$ 1.20       |
| HR, bpm          | 444 $\pm$ 7.21        | 434 $\pm$ 7.8         | 447 $\pm$ 4.9         | 444 $\pm$ 5.33        |
| CO, ml/min       | 13.9 $\pm$ 0,50       | 11.5 $\pm$ 0,32       | 15.3 $\pm$ 0,69       | 11.9 $\pm$ 0.32       |
| EDV, $\mu$ l     | 55.5 $\pm$ 2,07       | 45.5 $\pm$ 1.13       | 58.6 $\pm$ 1.42       | 48.0 $\pm$ 0.85       |

|                |                  |                  |                  |                  |
|----------------|------------------|------------------|------------------|------------------|
| ESV, $\mu$ l   | 24.2 $\pm$ 1.47  | 19.9 $\pm$ 0.92  | 24.5 $\pm$ 1.02  | 21.2 $\pm$ 0.69  |
| <b>Doppler</b> |                  |                  |                  |                  |
| E, mm/s        | 725 $\pm$ 25.5   | 663 $\pm$ 8.4    | 737 $\pm$ 8.53   | 714 $\pm$ 13.9   |
| A, mm/s        | 402 $\pm$ 22.4   | 354 $\pm$ 12.1   | 461 $\pm$ 14.6   | 385 $\pm$ 11.5   |
| E/A            | 1.85 $\pm$ 0,05  | 1.92 $\pm$ 0,07  | 1.64 $\pm$ 0,05* | 1.88 $\pm$ 0,044 |
| E', mm/s       | -25.1 $\pm$ 0,99 | -25.7 $\pm$ 1.07 | -25.5 $\pm$ 0.56 | -26.2 $\pm$ 0.71 |
| A', mm/s       | -17.9 $\pm$ 0,70 | -17,6 $\pm$ 0,52 | -19.2 $\pm$ 0,41 | -18.8 $\pm$ 0.51 |
| E/E'           | -29.0 $\pm$ 0.98 | -26.7 $\pm$ 1.19 | -29.3 $\pm$ 0.75 | -27.7 $\pm$ 0,76 |
| E'/A'          | 1.41 $\pm$ 0,04  | 1.47 $\pm$ 0,04  | 1.34 $\pm$ 0,03  | 1.40 $\pm$ 0,03  |

Left ventricle parameters were measured in male and female mice, either XY or XX. EDD: end-diastolic LV diameter; ESD: end-systolic LV diameter; PW: diastolic posterior wall thickness; IVS: diastolic inter-ventricular septum thickness; RWT: relative wall thickness; SV: Stroke volume; EF: Ejection fraction; HR: Heart rate; CO: Cardiac output; EDV: end-diastolic volume; ESV: end-systolic volume; E: E wave; A: A wave; E': E' wave; A': A' wave. Results are expressed as the mean  $\pm$  standard error of the mean (SEM) from the indicated number of animals. Two-way ANOVA analysis and Holm-Sidak post-test. \* $p < 0.05$  vs. same sex animals.

**Supplementary Table 3. Echocardiography (Echo) data from aging non-Gx FCG mice at 20 months.**

| Parameter        | MX<br>N = 11     | FXX<br>N = 11    | MXX<br>N = 13    | FX<br>N = 11     |
|------------------|------------------|------------------|------------------|------------------|
| <b>M-Mode</b>    |                  |                  |                  |                  |
| EDD, mm          | 3,7 $\pm$ 0,04   | 3,9 $\pm$ 0,09   | 3,8 $\pm$ 0,06   | 3.8 $\pm$ 0,09   |
| ESD, mm          | 2,2 $\pm$ 0,06   | 2,5 $\pm$ 0,11   | 2,4 $\pm$ 0,09   | 2.3 $\pm$ 0,13   |
| PW, mm           | 0,81 $\pm$ 0,01  | 0,80 $\pm$ 0,02  | 0,82 $\pm$ 0,02  | 0,84 $\pm$ 0,01  |
| IVS, mm          | 0,74 $\pm$ 0,01  | 0,74 $\pm$ 0,02  | 0,75 $\pm$ 0,01  | 0,75 $\pm$ 0,02  |
| RWT              | 0,42 $\pm$ 0,01  | 0,40 $\pm$ 0,01  | 0,42 $\pm$ 0,01  | 0,42 $\pm$ 0,01  |
| <b>Simpson's</b> |                  |                  |                  |                  |
| SV, mm           | 32.5 $\pm$ 1.19  | 34.5 $\pm$ 2.20  | 29.8 $\pm$ 0.87  | 32.6 $\pm$ 1.35  |
| EF, %            | 63 $\pm$ 1,2     | 62.2 $\pm$ 1.84  | 61.2 $\pm$ 1.83  | 63.6 $\pm$ 1.7   |
| HR, bpm          | 501 $\pm$ 12.7   | 492 $\pm$ 22.8   | 515 $\pm$ 12.3   | 488 $\pm$ 12.4   |
| CO, ml/min       | 16.3 $\pm$ 0,69  | 16.7 $\pm$ 1.01  | 15,4 $\pm$ 0,55  | 16.0 $\pm$ 0.93  |
| EDV, $\mu$ l     | 51.3 $\pm$ 1,64  | 55.5 $\pm$ 3.49  | 49.4 $\pm$ 2,30  | 51.5 $\pm$ 2.4   |
| ESV, $\mu$ l     | 18.9 $\pm$ 0.88  | 21.02 $\pm$ 1.68 | 19.6 $\pm$ 1.79  | 21.1 $\pm$ 0.59  |
| <b>Doppler</b>   |                  |                  |                  |                  |
| E, mm/s          | 660 $\pm$ 27.7   | 636 $\pm$ 28.4   | 569 $\pm$ 21.5*  | 683 $\pm$ 20.9   |
| A, mm/s          | 434 $\pm$ 17.6   | 423 $\pm$ 17.1   | 379 $\pm$ 9.1*   | 437 $\pm$ 17.0   |
| E/A              | 1,52 $\pm$ 0,02  | 1,52 $\pm$ 0,03  | 1.50 $\pm$ 0,05  | 1.61 $\pm$ 0,04  |
| E', mm/s         | -31.1 $\pm$ 1.33 | -31.4 $\pm$ 0.99 | -29.8 $\pm$ 0,59 | -32.0 $\pm$ 0.59 |
| A', mm/s         | -20.4 $\pm$ 1.19 | -20.6 $\pm$ 0.47 | -18.7 $\pm$ 0.59 | -19.8 $\pm$ 0.83 |
| E/E'             | -21.7 $\pm$ 1.46 | -20.0 $\pm$ 0.83 | -19.2 $\pm$ 0.78 | -21.4 $\pm$ 0.59 |
| E'/A'            | 1.54 $\pm$ 0.02  | 1.52 $\pm$ 0,03  | 1.6 $\pm$ 0,04   | 1.59 $\pm$ 0,04  |

Left ventricle parameters were measured in male and female mice, either XY or XX. Abbreviations: EDD: end-diastolic LV diameter; ESD: end-systolic LV diameter; PW: diastolic posterior wall thickness; IVS: diastolic inter-ventricular septum thickness; RWT: relative wall thickness; SV: Stroke volume; EF: Ejection fraction; HR: Heart rate; CO: Cardiac output; EDV: end-diastolic volume; ESV: end-systolic volume; E: E wave; A: A wave; E': E' wave; A': A' wave. Results are expressed as the mean  $\pm$  standard error of the mean (SEM) from the indicated number of animals. Two-way ANOVA analysis and Holm-Sidak post-test. \* $p < 0.05$  vs. same sex animals.

**Supplementary Table 4. Echocardiography (Echo) data from young gonadectomized FCG mice at 3 months.**

| Parameter        | MX<br>N = 8  | FX<br>N = 8  | MX<br>N = 6  | FX<br>N = 8   |
|------------------|--------------|--------------|--------------|---------------|
| <b>M-Mode</b>    |              |              |              |               |
| EDD, mm          | 3,7 ± 0,05   | 3,7 ± 0,04   | 3,9 ± 0,02   | 3,9 ± 0,02    |
| ESD, mm          | 2,7 ± 0,08   | 2,5 ± 0,07   | 2,8 ± 0,07   | 2,8 ± 0,07    |
| PW, mm           | 0,69 ± 0,02  | 0,74 ± 0,02  | 0,65 ± 0,02  | 0,65 ± 0,02** |
| IVS, mm          | 0,71 ± 0,02  | 0,72 ± 0,01  | 0,63 ± 0,02* | 0,63 ± 0,01** |
| RWT              | 0,38 ± 0,01  | 0,39 ± 0,01  | 0,33 ± 0,01* | 0,33 ± 0,01*  |
| <b>Simpson's</b> |              |              |              |               |
| SV, mm           | 29.1 ± 1.42  | 33.0 ± 0.67  | 34.2 ± 1.24  | 29,0 ± 1.14   |
| EF, %            | 57.8 ± 2,43  | 66.2 ± 1,21  | 57.8 ± 2.62  | 54,7 ± 1,94*  |
| HR, bpm          | 451 ± 13.0   | 480 ± 11.4   | 468 ± 18.3   | 407 ± 16,2*   |
| CO, ml/min       | 13.2 ± 0.85  | 15.8 ± 0,41  | 15.0 ± 0.33  | 11.9 ± 0.88   |
| EDV, µl          | 50.7 ± 2,01  | 49.9 ± 0.64  | 57.8 ± 2.61  | 53,0 ± 1.09   |
| ESV, µl          | 21.6 ± 1.79  | 16.9 ± 0.66  | 25.5 ± 1.45  | 24.0 ± 1.15*  |
| <b>Doppler</b>   |              |              |              |               |
| E, mm/s          | 694 ± 26.8   | 673 ± 17.1   | 711 ± 23.6   | 676 ± 21.7    |
| A, mm/s          | 432 ± 20.4   | 437 ± 17.6   | 443 ± 8.41   | 376 ± 14.0*   |
| E/A              | 1.63 ± 0,07  | 1.56 ± 0,04  | 1.60 ± 0,03  | 1.82 ± 0.07*  |
| E', mm/s         | -24.5 ± 1.43 | -26.8 ± 1.65 | -25.4 ± 0.97 | -24.6 ± 1.35  |
| A', mm/s         | -17.5 ± 0.90 | -17,7 ± 0,59 | -18.1 ± 0.86 | -19.5 ± 0.97  |
| E/E'             | -29.4 ± 1.99 | -25.9 ± 1.36 | -28.9 ± 1.53 | -27.9 ± 0,78  |
| E'/A'            | 1,42 ± 0,08  | 1,51 ± 0,08  | 1,42 ± 0,08  | 1,26 ± 0,01** |

Left ventricle parameters were measured in male and female mice, either XY or XX. Abbreviations: EDD: end-diastolic LV diameter; ESD: end-systolic LV diameter; PW: diastolic posterior wall thickness; IVS: diastolic inter-ventricular septum thickness; RWT: relative wall thickness; SV: Stroke volume; EF: Ejection fraction; HR: Heart rate; CO: Cardiac output; EDV: end-diastolic volume; ESV: end-systolic volume; E: E wave; A: A wave; E': E' wave; A': A' wave. Results are expressed as the mean ± standard error of the mean (SEM) from the indicated number of animals. Two-way ANOVA analysis and Holm-Sidak post-test. \* $p < 0.05$  and \*\* $p < 0.01$  vs. same sex animals.

**Supplementary Table 5. Echocardiography (Echo) data from aging gonadectomized FCG mice at 20 months.**

| Parameter        | MX<br>N = 7 | FX<br>N = 5 | MX<br>N = 7 | FX<br>N = 7 |
|------------------|-------------|-------------|-------------|-------------|
| <b>M-Mode</b>    |             |             |             |             |
| EDD, mm          | 3,7 ± 0,04  | 3,9 ± 0,10  | 3,8 ± 0,08  | 3,7 ± 0,09  |
| ESD, mm          | 2,1 ± 0,07  | 2,3 ± 0,15  | 2,3 ± 0,10  | 2,0 ± 0,04  |
| PW, mm           | 0,79 ± 0,02 | 0,86 ± 0,04 | 0,82 ± 0,02 | 0,84 ± 0,03 |
| IVS, mm          | 0,70 ± 0,01 | 0,78 ± 0,03 | 0,76 ± 0,03 | 0,75 ± 0,02 |
| RWT              | 0,40 ± 0,01 | 0,43 ± 0,02 | 0,42 ± 0,01 | 0,43 ± 0,01 |
| <b>Simpson's</b> |             |             |             |             |
| SV, mm           | 32.4 ± 1.41 | 35.5 ± 1.82 | 32.5 ± 1.69 | 32.9 ± 1.42 |
| EF, %            | 65.4 ± 1.12 | 64.2 ± 2.44 | 64.2 ± 0.97 | 67.6 ± 1.0  |
| HR, bpm          | 487 ± 16.3  | 508 ± 12.8  | 494 ± 7.2   | 497 ± 8.3   |
| CO, ml/min       | 15.8 ± 0.84 | 18.0 ± 0.78 | 16.0 ± 0.89 | 16.3 ± 0.53 |
| EDV, µl          | 49.5 ± 1.85 | 55.5 ± 3.59 | 50.6 ± 2.65 | 48.8 ± 2.2  |

|                |                  |                  |                  |                  |
|----------------|------------------|------------------|------------------|------------------|
| ESV, $\mu$ l   | 17.1 $\pm$ 0.81  | 20.0 $\pm$ 2.49  | 18.1 $\pm$ 1.13  | 15.9 $\pm$ 1.01  |
| <b>Doppler</b> |                  |                  |                  |                  |
| E, mm/s        | 607 $\pm$ 22.5   | 663 $\pm$ 26.5   | 632 $\pm$ 29.3   | 636 $\pm$ 31.2   |
| A, mm/s        | 363 $\pm$ 9.6    | 390 $\pm$ 9.6    | 409 $\pm$ 10.9*  | 395 $\pm$ 14.0   |
| E/A            | 1.70 $\pm$ 0.04  | 1.70 $\pm$ 0.06  | 1.55 $\pm$ 0.06  | 1.61 $\pm$ 0.03  |
| E', mm/s       | -29.6 $\pm$ 0.38 | -29.6 $\pm$ 0.56 | -30.8 $\pm$ 1.44 | -28.5 $\pm$ 0.63 |
| A', mm/s       | -16.7 $\pm$ 0.39 | -17.4 $\pm$ 1.15 | -18.5 $\pm$ 1.26 | -17.6 $\pm$ 0.70 |
| E/E'           | -20.5 $\pm$ 0.78 | -22.4 $\pm$ 1.09 | -20.6 $\pm$ 0.85 | -22.3 $\pm$ 0.92 |
| E'/A'          | 1.80 $\pm$ 0.04  | 1.74 $\pm$ 0.11  | 1.68 $\pm$ 0.06  | 1.63 $\pm$ 0.06  |

Left ventricle parameters were measured in male and female mice, either XY or XX. Abbreviations: EDD: end-diastolic LV diameter; ESD: end-systolic LV diameter; PW: diastolic posterior wall thickness; IVS: diastolic inter-ventricular septum thickness; RWT: relative wall thickness; SV: Stroke volume; EF: Ejection fraction; HR: Heart rate; CO: Cardiac output; EDV: end-diastolic volume; ESV: end-systolic volume; E: E wave; A: A wave; E': E' wave; A': A' wave. Results are expressed as the mean  $\pm$  standard error of the mean (SEM) from the indicated number of animals. Two-way ANOVA analysis and Holm-Sidak post-test. \* $p < 0.05$  vs. same-sex animals.

#### Supplementary Table 6. Differentially regulated LV genes between 24-month-old males and 24-month-old females.

| <b>Lower expression in females</b>  |                |                       |                 |
|-------------------------------------|----------------|-----------------------|-----------------|
| Gene                                | Mean count     | log <sub>2</sub> (FC) | q-Value         |
| <b>Ddx3y</b>                        | <b>775.2</b>   | <b>-7.25</b>          | <b>2.53E-04</b> |
| <b>Eif2s3y</b>                      | <b>526.89</b>  | <b>-6.62</b>          | <b>9.05E-04</b> |
| <b>Uty</b>                          | <b>227.66</b>  | <b>-6.54</b>          | <b>2.60E-05</b> |
| <b>Kdm5d</b>                        | <b>216.57</b>  | <b>-6.23</b>          | <b>0.00E+00</b> |
| Cyp26b1                             | 953.58         | -3.17                 | 2.60E-05        |
| C7                                  | 357.49         | -2.45                 | 0.00E+00        |
| Ppbp                                | 60.56          | -2.24                 | 1.46E-03        |
| Itga2b                              | 70.33          | -1.79                 | 2.10E-02        |
| Atp2b2                              | 51.79          | -1.37                 | 3.21E-03        |
| Npas2                               | 85.14          | -1.3                  | 3.08E-02        |
| Kcnk1                               | 113.37         | -1.28                 | 1.80E-04        |
| Prom2                               | 91.29          | -1.18                 | 8.38E-04        |
| Tmem171                             | 59.41          | -1.17                 | 4.95E-02        |
| Aqp8                                | 143.92         | -1.1                  | 3.52E-03        |
| <b>Higher expression in females</b> |                |                       |                 |
| <b>Xist</b>                         | <b>3969.72</b> | <b>9.24</b>           | <b>0.00E+00</b> |
| Car3                                | 52.27          | 2.64                  | 7.00E-06        |
| Lypd8l                              | 129.99         | 1.47                  | 6.12E-04        |
| Col14a1                             | 634.85         | 1.41                  | 0.00E+00        |
| Ptn                                 | 91.13          | 1.07                  | 2.78E-02        |
| Erdr1                               | 1099.73        | 1.06                  | 1.00E-06        |
| Dkk3                                | 229.81         | 1.06                  | 7.85E-03        |
| Kcne1                               | 74.77          | 1.06                  | 1.40E-02        |
| Lepr                                | 151.48         | 1.01                  | 1.60E-03        |

Mean count: Normalized mean count (male vs. female), FC: fold change and q-value: the proportion of false positives among all positive results. In bold, sex chromosome genes.

**Supplementary Table 7. Differentially regulated LV genes between 24-month-old males and 24-month-old Gx males.**

| <b>Lower expression in Gx males</b>  |                   |                            |                |
|--------------------------------------|-------------------|----------------------------|----------------|
| <b>Gene</b>                          | <b>Mean Count</b> | <b>log<sub>2</sub>(FC)</b> | <b>q-Value</b> |
| C7                                   | 364.22            | -1.96                      | 1.00E-06       |
| Lcn2                                 | 60.24             | -1.94                      | 5.00E-06       |
| Cnmd                                 | 70.31             | -1.43                      | 6.98E-03       |
| Klk1b26                              | 51.86             | -1.32                      | 3.66E-02       |
| Cyp2b10                              | 209.23            | -1.28                      | 2.26E-04       |
| Mmp3                                 | 183.84            | -1.04                      | 6.38E-03       |
| <b>Higher expression in Gx males</b> |                   |                            |                |
| Lrrc55                               | 56.78             | 2.15                       | 0.00E+00       |
| Col14a1                              | 635.06            | 1.49                       | 0.00E+00       |
| Ptn                                  | 94.82             | 1.24                       | 6.98E-03       |
| Mdk                                  | 60.65             | 1.1                        | 9.50E-03       |

Mean count: Normalized mean count (male vs. female), FC: fold change and *q*-value: the proportion of false positives among all positive results.

**Supplementary Table 8. Differentially regulated LV genes between 24-month-old females and 24-month-old Gx females.**

| <b>Lower expression in Gx females</b> |                   |                            |                |
|---------------------------------------|-------------------|----------------------------|----------------|
| <b>Gene</b>                           | <b>Mean count</b> | <b>log<sub>2</sub>(FC)</b> | <b>q-Value</b> |
| Fkbp5                                 | 672.41            | -1.1                       | 2.30E-05       |
| Ifi205                                | 379.99            | -1.02                      | 3.60E-05       |
| Zbtb16                                | 3608.46           | -1                         | 7.86E-03       |

Mean count: Normalized mean count (male vs. female), FC: fold change and *q*-value: the proportion of false positives among all positive results.
